# Supplementary material
Source: PubMed Central journal article supplement (PMC3785775)
Supplement: 1309049110_pnas.201309049SI.pdf [file 1309049110_pnas.201309049SI.pdf]

# Supporting Information

d'Emmanuele di Villa Bianca et al. 10.1073/pnas.1309049110

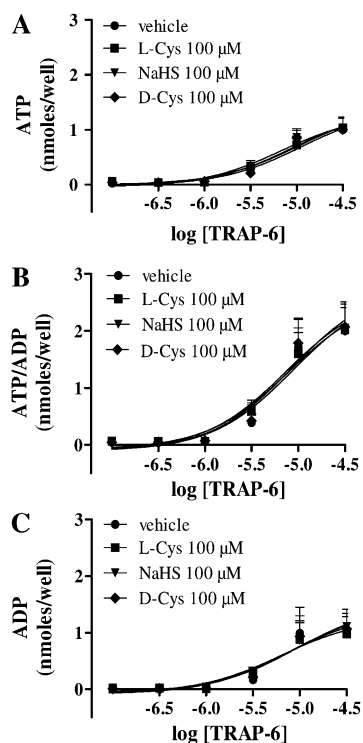

**Fig. S1.** Measurement of ATP and ADP release from human washed platelets. NaHS (100  $\mu$ M), L-Cys (100  $\mu$ M), and D-Cys (100  $\mu$ M) did not modify (A) ATP, (B) ATP/ADP, or (C) ADP release from washed platelets harvested from healthy volunteers. Results are expressed as nmol per well and calculated as mean  $\pm$  SEM from six healthy volunteers. Data were analyzed using one-way ANOVA followed by Dunnett posttest.
